# Supplementary material for: trans-Polydatin protects the mouse heart against ischemia/reperfusion injury via inhibition of the renin–angiotensin system (RAS) and Rho kinase (ROCK) activity
Source: Royal Society of Chemistry journal article supplement (doi:10.1039/c6fo01842d), 2017-01-01
Supplement: c6fo01842d1.pdf [file c6fo01842d1.pdf]

## Supplement 1

Effect of PD and ACEI on angiotensionogen in post myocardial SIR injury. Data are expressed as mean  $\pm$  SD. \* $p < 0.01$  vs NC, # $p < 0.01$  vs IR. NC: normal control; SIR, simulated ischemia-reperfusion; PD2: trans-polydatin, (50  $\mu$ M); ACEI: angiotensin-converting enzyme inhibitor.
