# Supplementary figures and images for: trans-Polydatin protects the mouse heart against ischemia/reperfusion injury via inhibition of the renin–angiotensin system (RAS) and Rho kinase (ROCK) activity
Source: Royal Society of Chemistry journal article supplement (doi:10.1039/c6fo01842d), 2017-01-01

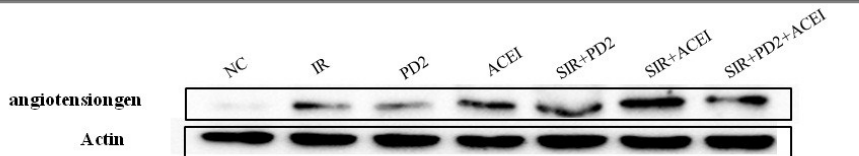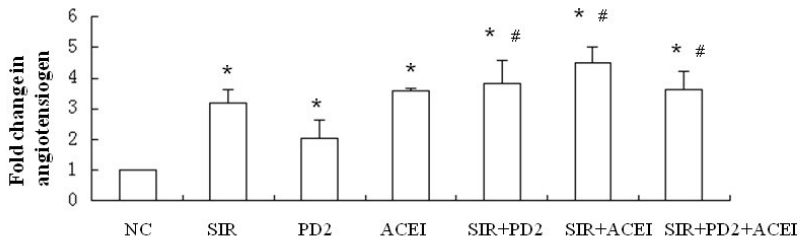

Supplement: c6fo01842d2.pdf [file c6fo01842d2.pdf]
